# Supplementary material for: First stable 7,7,8,8-tetraaryl-o-quinodimethane: isolation, X-ray structure, electrochromic response of 9,10-bis(dianisylmethylene)-9,10-dihydrophenanthreneElectronic supplementary information (ESI) available: ORTEP drawings of 12+ and 2. See http://www.rsc.org/suppdata/cc/b4/b405837b/
Source: Royal Society of Chemistry journal article supplement (doi:10.1039/b405837b), 2004-01-01
Supplement: b405837b.pdf [file b405837b.pdf]

Electronic Supplementary Material:

"First stable 7,7,8,8-tetraaryl-o-quinodimethane: Isolation, X-ray structure, electrochromic response of 9,10-bis(dianisylmethylene)-9,10-dihydrophenanthrene"

by Shinichi Iwashita, Eisuke Ohta, Hiroki Higuchi, Hidetoshi Kawai, Kenshu Fujiwara,  
Kazunori Ono, Masami Takenaka and Takanori Suzuki\*

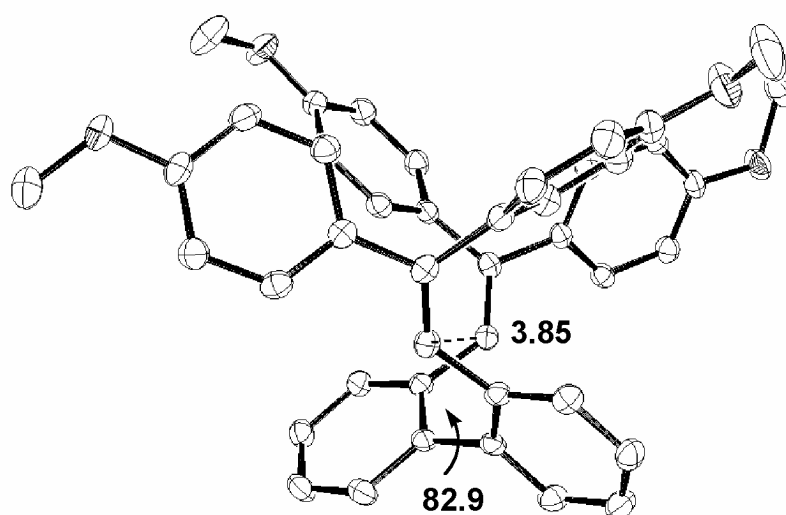

**Fig. S1 ORTEP drawing of compound 2 determined by X-ray analysis at 153 K.**

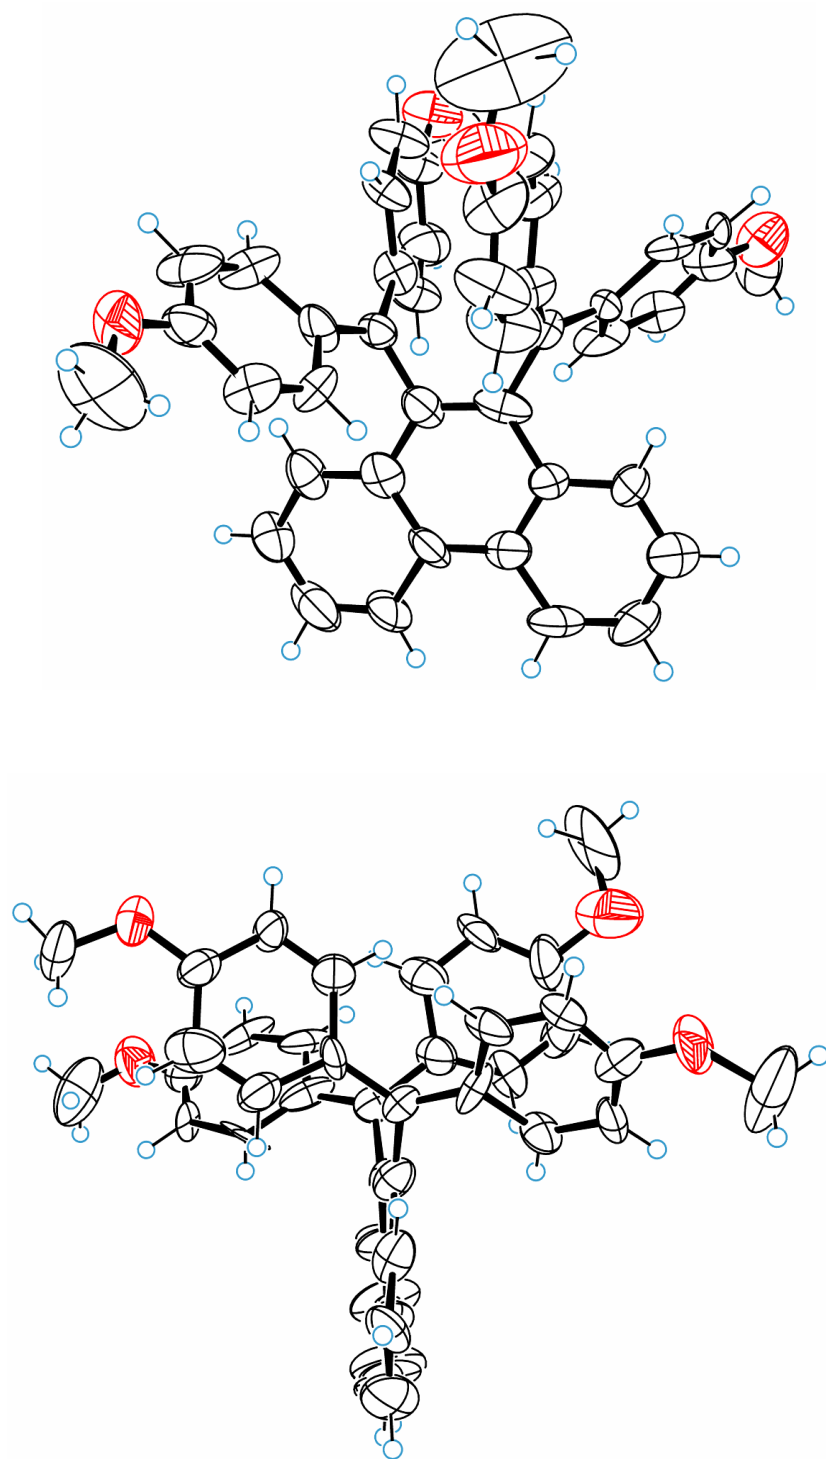

**Fig. S2 ORTEP drawing of dication 1<sup>2+</sup>  
determined by X-ray analysis (non-converged).**
